# Supplementary material for: Residential Greenspace Is Associated with Lower Levels of Depressive and Burnout Symptoms, and Higher Levels of Life Satisfaction: A Nationwide Population-Based Study in Sweden
Source: MDPI journal article supplement (doi:10.3390/ijerph19095668), 2022-05-06
Supplement: s1 [file s1]

## Supplementary information

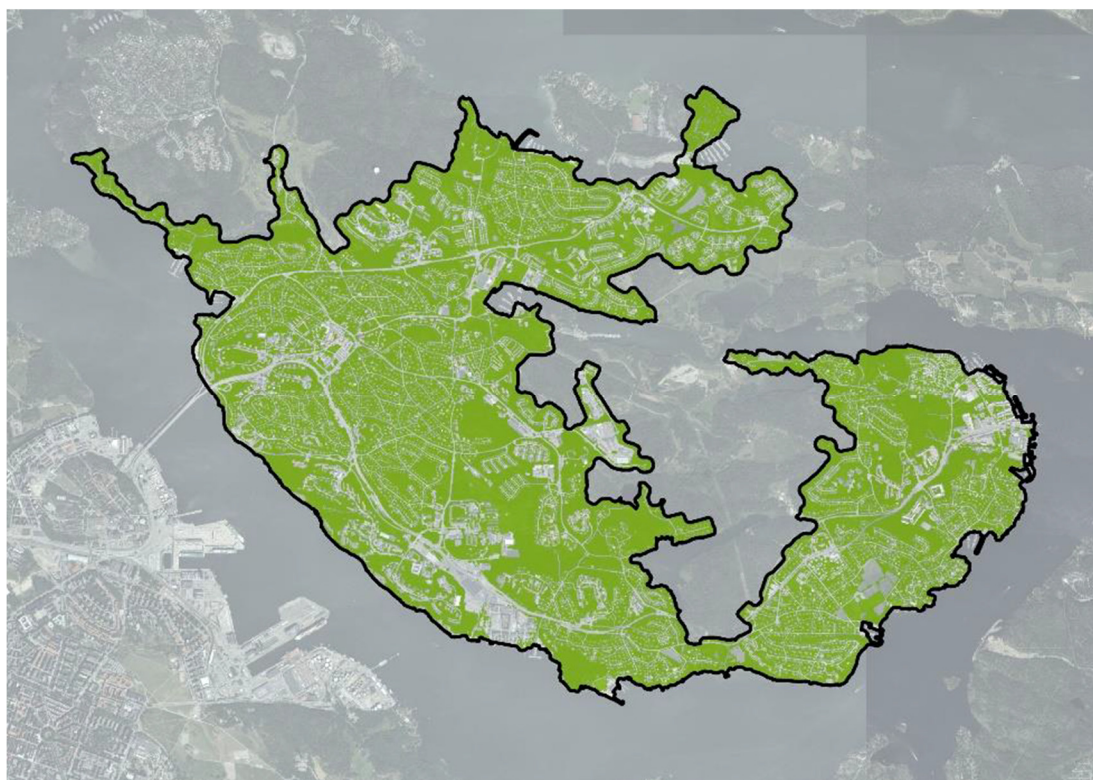

**Supplementary Figure S1.** An example map of total greenspace land cover (green), and built space land cover (in grey, incl. buildings, paved land, road and rail networks) in one of the greenest urban areas in Sweden, with ca. 70% total greenspace (the urban area of Lidingö municipality, a suburb of Stockholm City) [32]: Source: SCB, ortofoto © Lantmäteriet.

**Table S1.** Associations between residential greenspace at 50 m, 100 m 300 m and 500 m buffers, and depressive symptoms (subsample: working).

| Model,<br>N= | 50 m Buffer |        |                                        |       | 100 m Buffer |        |                                        |       | 300 m Buffer |        |                                        |       | 500 m Buffer |        |                                        |       |
|--------------|-------------|--------|----------------------------------------|-------|--------------|--------|----------------------------------------|-------|--------------|--------|----------------------------------------|-------|--------------|--------|----------------------------------------|-------|
|              | $\beta$     | B      | Lower,<br>upper<br>(95%<br>CI of<br>B) | p     | $\beta$      | B      | Lower,<br>upper<br>(95%<br>CI of<br>B) | p     | $\beta$      | B      | Lower,<br>upper<br>(95%<br>CI of<br>B) | p     | $\beta$      | B      | Lower,<br>upper<br>(95%<br>CI of<br>B) | p     |
| 1            | -0.015      | -0.004 | -0.009,<br>0.001                       | 0.119 | -0.003       | -0.001 | -0.006,<br>0.004                       | 0.767 | -0.008       | -0.002 | -0.008,<br>0.003                       | 0.438 | -0.009       | -0.003 | -0.009,<br>0.003                       | 0.363 |
| 2            | -0.008      | -0.002 | -0.007,<br>0.003                       | 0.402 | 0.002        | 0.001  | -0.005,<br>0.006                       | 0.842 | -0.006       | -0.002 | -0.007,<br>0.004                       | 0.551 | -0.008       | -0.002 | -0.008,<br>0.003                       | 0.425 |
| 3            | -0.009      | -0.002 | -0.007,<br>0.003                       | 0.364 | 0.002        | 0.000  | 0.005,<br>0.006                        | 0.867 | -0.006       | -0.002 | -0.007,<br>0.004                       | 0.549 | -0.008       | -0.002 | -0.008,<br>0.003                       | 0.411 |
| 4            | -0.009      | -0.002 | -0.007,<br>0.003                       | 0.360 | 0.002        | 0.000  | -0.005,<br>0.006                       | 0.877 | -0.007       | -0.002 | -0.008,<br>0.004                       | 0.502 | -0.009       | -0.003 | -0.009,<br>0.003                       | 0.353 |
| 5            | 0.007       | 0.002  | -0.003,<br>0.007                       | 0.471 | 0.018        | 0.005  | 0.000,<br>0.010                        | 0.066 | 0.007        | 0.002  | -0.004,<br>0.008                       | 0.457 | .003         | .001   | -0.005,<br>0.007                       | 0.761 |

Note: Variables in Model 1= residential greenspace, unadjusted; Model 2= Model 1 + age, sex; Model 3= Model 2 + average neighborhood income; Model 4 = Model 3 + individual income; Model 5 = Model 4 + relationship status

B= unstandardized beta coefficient,  $\beta$  = standardized beta coefficient

**Table S2.** Associations between residential greenspace at 50 m, 100 m 300 m and 500 m buffers, and burnout symptoms (subsample: working).

| 50 m Buffer | 100 m Buffer | 300 m Buffer | 500 m Buffer |
|-------------|--------------|--------------|--------------|
|-------------|--------------|--------------|--------------|



|   |        |        | CI of<br>B)       |       |        |        | CI of<br>B)       |       |        |        | CI of<br>B)       |       |        |        | CI of<br>B)       |       |
|---|--------|--------|-------------------|-------|--------|--------|-------------------|-------|--------|--------|-------------------|-------|--------|--------|-------------------|-------|
| 1 | -0.027 | -0.007 | -0.011,<br>-0.003 | 0.001 | -0.019 | -0.005 | -0.010,<br>-0.001 | 0.023 | -0.026 | -0.008 | -0.013,<br>-0.003 | 0.002 | -0.029 | -0.009 | -0.015,<br>-0.004 | 0.001 |
| 2 | -0.017 | -0.004 | -0.009,<br>0.000  | 0.038 | -0.010 | -0.003 | -0.007,<br>0.002  | 0.215 | -0.019 | -0.006 | -0.011,<br>-0.001 | 0.019 | -0.022 | -0.007 | -0.012,<br>-0.002 | 0.007 |
| 3 | -0.018 | -0.005 | -0.009,<br>0.000  | 0.028 | -0.010 | -0.003 | -0.007,<br>0.002  | 0.216 | -0.017 | -0.005 | -0.010,<br>0.000  | 0.036 | -0.020 | -0.006 | -0.012,<br>-0.001 | 0.017 |
| 4 | -0.017 | -0.005 | -0.009,<br>0.000  | 0.034 | -0.010 | -0.003 | -0.007,<br>0.002  | 0.222 | -0.018 | -0.006 | -0.011,<br>-0.001 | 0.028 | -0.021 | -0.007 | -0.012,<br>-0.002 | 0.011 |
| 5 | -0.001 | 0.000  | -0.004,<br>0.004  | 0.940 | -0.008 | 0.002  | -0.002,<br>0.007  | 0.360 | -0.003 | -0.001 | -0.006,<br>-0.004 | 0.714 | -0.008 | -0.003 | -0.008,<br>0.003  | 0.349 |

Note: Variables in Model 1= residential green- and blue space, unadjusted; Model 2= Model 1 + age, sex; Model 3= Model 2 + average neighborhood income; Model 4 = Model 3 + individual income; Model 5 = Model 4 + relationship status

$\beta$ = Standardized beta coefficient; B= Unstandardized beta coefficient

**Table S4.** Associations between residential green- and blue space at 50 m, 100 m 300 m and 500 m buffers, and depressive symptoms (subsample: non-working).

| 50 m Buffer        |   |   |                                        |   | 100 m Buffer |   |                                        |   | 300 m Buffer |   |                                        |   | 500 m Buffer |   |                                        |   |
|--------------------|---|---|----------------------------------------|---|--------------|---|----------------------------------------|---|--------------|---|----------------------------------------|---|--------------|---|----------------------------------------|---|
| Model,<br>N= 4 120 | β | B | Lower,<br>upper<br>(95%<br>CI of<br>B) | p | β            | B | Lower,<br>upper<br>(95%<br>CI of<br>B) | p | β            | B | Lower,<br>upper<br>(95%<br>CI of<br>B) | p | β            | B | Lower,<br>upper<br>(95%<br>CI of<br>B) | p |

|   |        |        |                   |       |        |        |                   |       |        |        |                   |       |        |        |                   |       |
|---|--------|--------|-------------------|-------|--------|--------|-------------------|-------|--------|--------|-------------------|-------|--------|--------|-------------------|-------|
| 1 | -0.059 | -0.015 | -0.023,<br>-0.007 | 0.000 | -0.056 | -0.015 | -0.024,<br>-0.007 | 0.000 | -0.058 | -0.018 | -0.027,<br>-0.008 | 0.000 | -0.065 | -0.021 | -0.031,<br>-0.011 | 0.000 |
| 2 | -0.040 | -0.010 | -0.018,<br>-0.003 | 0.008 | -0.038 | -0.010 | -0.018,<br>-0.002 | 0.014 | -0.042 | -0.013 | -0.022,<br>-0.004 | 0.006 | -0.050 | -0.016 | -0.025,<br>-0.006 | 0.001 |
| 3 | -0.042 | -0.011 | -0.018,<br>-0.003 | 0.006 | -0.037 | -0.010 | -0.018,<br>-0.002 | 0.015 | -0.037 | -0.011 | -0.020,<br>-0.002 | 0.015 | -0.044 | -0.014 | -0.024,<br>-0.004 | 0.004 |
| 4 | -0.043 | -0.011 | -0.019,<br>-0.003 | 0.004 | -0.039 | -0.011 | -0.019,<br>-0.003 | 0.009 | -0.041 | -0.013 | -0.022,<br>-0.004 | 0.006 | -0.048 | -0.015 | -0.025,<br>-0.006 | 0.001 |
| 5 | -0.025 | -0.006 | -0.014,<br>0.001  | 0.095 | -0.021 | -0.006 | -0.014,<br>0.003  | 0.176 | -0.025 | -0.008 | -0.017,<br>0.001  | 0.102 | -0.034 | -0.011 | -0.020,<br>-0.001 | 0.026 |

Note: Variables in Model 1= residential green- and blue space, unadjusted; Model 2= Model 1 + age, sex; Model 3= Model 2 + average neighborhood income; Model 4 = Model 3 + individual income; Model 5 = Model 4 + relationship status

$\beta$ = Standardized beta coefficient; B= Unstandardized beta coefficient

**Table S5.** Associations between residential green- and blue space at 50 m, 100 m 300 m and 500 m buffers, and depressive symptoms (subsample: working).

| Model,<br>N=<br>10 170 | 50 m Buffer |        |                                        |       | 100 m Buffer |        |                                        |       | 300 m Buffer |        |                                        |       | 500 m Buffer |        |                                        |       |
|------------------------|-------------|--------|----------------------------------------|-------|--------------|--------|----------------------------------------|-------|--------------|--------|----------------------------------------|-------|--------------|--------|----------------------------------------|-------|
|                        | $\beta$     | B      | Lower,<br>upper<br>(95%<br>CI of<br>B) | p     | $\beta$      | B      | Lower,<br>upper<br>(95%<br>CI of<br>B) | p     | $\beta$      | B      | Lower,<br>upper<br>(95%<br>CI of<br>B) | p     | $\beta$      | B      | Lower,<br>upper<br>(95%<br>CI of<br>B) | p     |
| 1                      | -0.016      | -0.004 | -0.009,<br>0.001                       | 0.108 | -0.006       | -0.002 | -0.007,<br>0.004                       | 0.563 | -0.015       | -0.005 | -0.011,<br>0.001                       | 0.138 | -0.015       | -0.005 | -0.011,<br>0.001                       | 0.124 |

|   |        |        |                  |       |       |       |                  |       |        |        |                  |       |        |        |                  |       |
|---|--------|--------|------------------|-------|-------|-------|------------------|-------|--------|--------|------------------|-------|--------|--------|------------------|-------|
| 2 | -0.008 | -0.002 | -0.007,<br>0.003 | 0.412 | 0.000 | 0.000 | -0.005,<br>0.005 | 0.969 | -0.011 | -0.003 | -0.009,<br>0.003 | 0.281 | -0.012 | -0.004 | -0.010,<br>0.002 | 0.225 |
| 3 | -0.009 | -0.002 | -0.007,<br>0.003 | 0.377 | 0.000 | 0.000 | -0.005,<br>0.005 | 0.973 | -0.010 | -0.003 | -0.009,<br>0.003 | 0.330 | -0.010 | -0.003 | -0.010,<br>0.003 | 0.286 |
| 4 | -0.009 | -0.002 | -0.007,<br>0.003 | 0.371 | 0.000 | 0.000 | -0.005,<br>0.005 | 0.978 | -0.010 | -0.003 | -0.009,<br>0.003 | 0.302 | -0.011 | -0.004 | -0.010,<br>0.003 | 0.245 |
| 5 | 0.008  | 0.002  | -0.003,<br>0.007 | 0.449 | 0.017 | 0.005 | -0.001,<br>0.010 | 0.082 | 0.004  | 0.001  | -0.005,<br>0.007 | 0.676 | 0.001  | 0.000  | -0.006,<br>0.007 | 0.924 |

Note: Variables in Model 1= residential green- and blue space, unadjusted; Model 2= Model 1 + age, sex; Model 3= Model 2 + average neighborhood income; Model 4 = Model 3 + individual income; Model 5 = Model 4 + relationship status

$\beta$ = Standardized beta coefficient; B= Unstandardized beta coefficient

**Table S6.** Associations between residential green- and blue space at 50 m, 100 m 300 m and 500 m buffers, and burnout symptoms (whole sample/population).

| Model,<br>N=<br>14 303 | 50 m Buffer |        |                                        |       | 100 m Buffer |        |                                     |       | 300 m Buffer |        |                                        |       | 500 m Buffer |        |                                        |       |
|------------------------|-------------|--------|----------------------------------------|-------|--------------|--------|-------------------------------------|-------|--------------|--------|----------------------------------------|-------|--------------|--------|----------------------------------------|-------|
|                        | $\beta$     | B      | Lower,<br>upper<br>(95%<br>CI of<br>B) | p     | $\beta$      | B      | Lower,<br>upper<br>(95% CI<br>of B) | p     | $\beta$      | B      | Lower,<br>upper<br>(95%<br>CI of<br>B) | p     | $\beta$      | B      | Lower,<br>upper<br>(95%<br>CI of<br>B) | p     |
| 1                      | -0.021      | -0.001 | -0.002,<br>0.000                       | 0.011 | -0.015       | -0.001 | -0.002,<br>0.000                    | 0.069 | -0.020       | -0.002 | -0.003,<br>0.000                       | 0.017 | -0.023       | -0.002 | -0.003,<br>0.001                       | 0.006 |
| 2                      | -0.009      | -0.001 | -0.002,<br>0.000                       | 0.025 | -0.005       | 0.000  | -0.001,<br>0.001                    | 0.569 | -0.011       | -0.001 | -0.002,<br>0.000                       | 0.161 | -0.015       | -0.001 | -0.002,<br>0.000                       | 0.067 |

|   |        |        |                  |       |        |       |                  |       |        |        |                  |       |        |        |                  |       |
|---|--------|--------|------------------|-------|--------|-------|------------------|-------|--------|--------|------------------|-------|--------|--------|------------------|-------|
| 3 | -0.011 | -0.001 | -0.002,<br>0.000 | 0.170 | -0.005 | 0.000 | -0.001,<br>0.001 | 0.569 | -0.008 | -0.001 | -0.002,<br>0.001 | 0.319 | -0.010 | -0.001 | -0.002,<br>0.000 | 0.202 |
| 4 | -0.010 | -0.001 | -0.002,<br>0.000 | 0.200 | -0.004 | 0.000 | -0.001,<br>0.001 | 0.588 | -0.009 | -0.001 | -0.002,<br>0.001 | 0.273 | -0.012 | -0.001 | -0.002,<br>0.000 | 0.155 |
| 5 | -0.002 | 0.000  | -0.001,<br>0.001 | 0.794 | -0.009 | 0.001 | -0.001,<br>0.002 | 0.288 | -0.002 | 0.000  | -0.001,<br>0.001 | 0.777 | -0.002 | 0.000  | -0.001,<br>0.001 | 0.823 |

Note: Variables in Model 1= residential green- and blue space, unadjusted; Model 2= Model 1 + age, sex; Model 3= Model 2 + average neighborhood income; Model 4 = Model 3 + individual income; Model 5 = Model 4 + relationship status

$\beta$ = Standardized beta coefficient; B= Unstandardized beta coefficient

**Table S7.** Associations between residential green- and blue space at 50 m, 100 m 300 m and 500 m buffers, and burnout symptoms (subsample: non-working).

| Model,<br>N= 4 116 | 50 m Buffer |        |                                        |       | 100 m Buffer |        |                                        |       | 300 m Buffer |        |                                        |       | 500 m Buffer |        |                                        |       |
|--------------------|-------------|--------|----------------------------------------|-------|--------------|--------|----------------------------------------|-------|--------------|--------|----------------------------------------|-------|--------------|--------|----------------------------------------|-------|
|                    | $\beta$     | B      | Lower,<br>upper<br>(95%<br>CI of<br>B) | p     | $\beta$      | B      | Lower,<br>upper<br>(95%<br>CI of<br>B) | p     | $\beta$      | B      | Lower,<br>upper<br>(95%<br>CI of<br>B) | p     | $\beta$      | B      | Lower,<br>upper<br>(95%<br>CI of<br>B) | p     |
| 1                  | -0.050      | -0.003 | -0.005,<br>-0.001                      | 0.001 | -0.049       | -0.003 | -0.005,<br>-0.001                      | 0.002 | -0.056       | -0.004 | -0.007,<br>-0.002                      | 0.000 | -0.059       | -0.005 | -0.007,<br>-0.002                      | 0.000 |
| 2                  | -0.027      | -0.002 | -0.004,<br>0.000                       | 0.073 | -0.026       | -0.002 | -0.004,<br>0.000                       | 0.086 | -0.035       | -0.003 | -0.005,<br>0.000                       | 0.020 | -0.038       | -0.003 | -0.005,<br>-0.001                      | 0.010 |
| 3                  | -0.028      | -0.002 | -0.004,<br>0.000                       | 0.058 | -0.025       | -0.002 | -0.004,<br>0.000                       | 0.088 | -0.031       | -0.002 | -0.005,<br>0.000                       | 0.037 | -0.034       | -0.003 | -0.005,<br>-0.001                      | 0.024 |

|   |        |        |                  |       |        |        |                  |       |        |        |                  |       |        |        |                   |       |
|---|--------|--------|------------------|-------|--------|--------|------------------|-------|--------|--------|------------------|-------|--------|--------|-------------------|-------|
| 4 | -0.029 | -0.002 | -0.004,<br>0.000 | 0.053 | -0.027 | -0.002 | -0.004,<br>0.000 | 0.070 | -0.034 | -0.003 | -0.005,<br>0.000 | 0.022 | -0.037 | -0.003 | -0.005,<br>-0.001 | 0.013 |
| 5 | -0.019 | -0.001 | -0.003,<br>0.001 | 0.212 | -0.016 | -0.001 | -0.003,<br>0.001 | 0.275 | -0.025 | -0.002 | -0.004,<br>0.000 | 0.097 | -0.029 | -0.002 | -0.005,<br>0.000  | 0.054 |

Note: Variables in Model 1= residential green- and blue space, unadjusted; Model 2= Model 1 + age, sex; Model 3= Model 2 + average neighborhood income; Model 4 = Model 3 + individual income; Model 5 = Model 4 + relationship status

$\beta$ = Standardized beta coefficient; B= Unstandardized beta coefficient

**Table S8.** Associations between residential green- and blue space at 50 m, 100 m 300 m and 500 m buffers, and burnout symptoms (subsample: working).

| Model,<br>N= | 50 m Buffer |        |                                        |       | 100 m Buffer |       |                                        |       | 300 m Buffer |        |                                        |       | 500 m Buffer |        |                                        |       |
|--------------|-------------|--------|----------------------------------------|-------|--------------|-------|----------------------------------------|-------|--------------|--------|----------------------------------------|-------|--------------|--------|----------------------------------------|-------|
|              | $\beta$     | B      | Lower,<br>upper<br>(95%<br>CI of<br>B) | p     | $\beta$      | B     | Lower,<br>upper<br>(95%<br>CI of<br>B) | p     | $\beta$      | B      | Lower,<br>upper<br>(95%<br>CI of<br>B) | p     | $\beta$      | B      | Lower,<br>upper<br>(95%<br>CI of<br>B) | p     |
| 1            | -0.012      | -0.001 | -0.002,<br>0.000                       | 0.211 | -0.003       | 0.000 | -0.002,<br>0.001                       | 0.729 | -0.007       | -0.001 | -0.002,<br>0.001                       | 0.482 | -0.010       | -0.001 | -0.002,<br>0.001                       | 0.334 |
| 2            | -0.004      | 0.000  | -0.002,<br>0.001                       | 0.652 | 0.003        | 0.000 | -0.001,<br>0.001                       | 0.780 | -0.003       | 0.000  | -0.002,<br>0.001                       | 0.774 | -0.006       | 0.000  | -0.002,<br>0.001                       | 0.524 |
| 3            | -0.006      | 0.000  | -0.002,<br>0.001                       | 0.521 | 0.003        | 0.000 | -0.001,<br>0.001                       | 0.793 | 0.000        | 0.000  | -0.001,<br>0.001                       | 0.976 | -0.002       | 0.000  | -0.001,<br>0.001                       | 0.853 |
| 4            | -0.006      | 0.000  | -0.002,<br>0.001                       | 0.507 | 0.002        | 0.000 | -0.001,<br>0.001                       | 0.807 | -0.001       | 0.000  | -0.002,<br>0.001                       | 0.940 | -0.003       | 0.000  | -0.002,<br>0.001                       | 0.724 |
| 5            | 0.007       | 0.000  | -0.001,<br>0.002                       | 0.466 | 0.017        | 0.001 | 0.000,<br>0.002                        | 0.091 | 0.011        | 0.001  | -0.001,<br>0.002                       | 0.248 | 0.007        | 0.001  | -0.001,<br>0.002                       | 0.477 |



Note: Variables in Model 1= residential green- and blue space, unadjusted; Model 2= Model 1 + age, sex; Model 3= Model 2 + average neighborhood income; Model 4 = Model 3 + individual income; Model 5 = Model 4 + relationship status

$\beta$ = Standardized beta coefficient; B= Unstandardized beta coefficient

**Table S9.** Associations between residential green- and blue space at 50 m, 100 m, 300 m and 500 m buffers, and life satisfaction (whole sample/population).

| Model,<br>N= | 50 m Buffer |       |                                        |       | 100 m Buffer |        |                                        |       | 300 m Buffer |       |                                        |       | 500 m Buffer |       |                                        |       |
|--------------|-------------|-------|----------------------------------------|-------|--------------|--------|----------------------------------------|-------|--------------|-------|----------------------------------------|-------|--------------|-------|----------------------------------------|-------|
|              | $\beta$     | B     | Lower,<br>upper<br>(95%<br>CI of<br>B) | p     | $\beta$      | B      | Lower,<br>upper<br>(95%<br>CI of<br>B) | p     | $\beta$      | B     | Lower,<br>upper<br>(95%<br>CI of<br>B) | p     | $\beta$      | B     | Lower,<br>upper<br>(95%<br>CI of<br>B) | p     |
| 1            | 0.035       | 0.002 | 0.001,<br>0.003                        | 0.000 | 0.031        | 0.002  | 0.001,<br>0.003                        | 0.000 | 0.035        | 0.003 | 0.001,<br>0.004                        | 0.000 | 0.030        | 0.002 | 0.001,<br>0.004                        | 0.000 |
| 2            | 0.032       | 0.002 | 0.001,<br>0.003                        | 0.000 | 0.028        | 0.002  | 0.001,<br>0.003                        | 0.001 | 0.033        | 0.003 | 0.001,<br>0.004                        | 0.000 | 0.028        | 0.002 | 0.001,<br>0.004                        | 0.001 |
| 3            | 0.034       | 0.002 | 0.001,<br>0.003                        | 0.000 | 0.028        | 0.002  | 0.001,<br>0.003                        | 0.001 | 0.029        | 0.002 | 0.001,<br>0.003                        | 0.001 | 0.022        | 0.002 | 0.000,<br>0.003                        | 0.009 |
| 4            | 0.033       | 0.002 | 0.001,<br>0.003                        | 0.000 | 0.028        | 0.002  | 0.001,<br>0.003                        | 0.001 | 0.029        | 0.002 | 0.001,<br>0.003                        | 0.000 | 0.023        | 0.002 | 0.001,<br>0.003                        | 0.005 |
| 5            | -0.001      | 0.000 | -0.001,<br>0.001                       | 0.890 | -0.008       | -0.001 | -0.002,<br>0.001                       | 0.348 | -0.001       | 0.000 | -0.001,<br>0.001                       | 0.896 | -0.004       | 0.000 | -0.002,<br>0.001                       | 0.660 |

Note: Variables in Model 1= residential green- and blue space, unadjusted; Model 2= Model 1 + age, sex; Model 3= Model 2 + average neighborhood income; Model 4 = Model 3 + individual income; Model 5 = Model 4 + relationship status

$\beta$ = Standardized beta coefficient; B= Unstandardized beta coefficient

**Table S10.** Associations between residential green- and blue space at 50 m, 100 m, 300 m and 500 m buffers, and life satisfaction (subsample: non-working).

| Model,<br>N= 4 102 | 50 m Buffer |       |                                        |       | 100 m Buffer |       |                                        |       | 300 m Buffer |       |                                        |       | 500 m Buffer |       |                                        |       |
|--------------------|-------------|-------|----------------------------------------|-------|--------------|-------|----------------------------------------|-------|--------------|-------|----------------------------------------|-------|--------------|-------|----------------------------------------|-------|
|                    | $\beta$     | B     | Lower,<br>upper<br>(95%<br>CI of<br>B) | p     | $\beta$      | B     | Lower,<br>upper<br>(95%<br>CI of<br>B) | p     | $\beta$      | B     | Lower,<br>upper<br>(95%<br>CI of<br>B) | p     | $\beta$      | B     | Lower,<br>upper<br>(95%<br>CI of<br>B) | p     |
| 1                  | 0.056       | 0.004 | 0.002,<br>0.006                        | 0.000 | 0.051        | 0.004 | 0.001,<br>0.006                        | 0.001 | 0.054        | 0.004 | 0.002,<br>0.007                        | 0.001 | 0.054        | 0.004 | 0.002,<br>0.007                        | 0.001 |
| 2                  | 0.049       | 0.003 | 0.001,<br>0.005                        | 0.002 | 0.044        | 0.003 | 0.001,<br>0.005                        | 0.005 | 0.048        | 0.004 | 0.001,<br>0.006                        | 0.002 | 0.048        | 0.004 | 0.001,<br>0.006                        | 0.002 |
| 3                  | 0.052       | 0.003 | 0.001,<br>0.005                        | 0.001 | 0.044        | 0.003 | 0.001,<br>0.005                        | 0.005 | 0.042        | 0.003 | 0.001,<br>0.006                        | 0.007 | 0.041        | 0.003 | 0.001,<br>0.006                        | 0.009 |
| 4                  | 0.053       | 0.003 | 0.001,<br>0.005                        | 0.001 | 0.046        | 0.003 | 0.001,<br>0.005                        | 0.003 | 0.046        | 0.004 | 0.001,<br>0.006                        | 0.003 | 0.045        | 0.004 | 0.001,<br>0.006                        | 0.004 |
| 5                  | 0.024       | 0.002 | 0.000,<br>0.003                        | 0.119 | 0.015        | 0.001 | -0.001,<br>0.003                       | 0.321 | 0.019        | 0.001 | -0.001,<br>0.004                       | 0.211 | 0.021        | 0.002 | -0.001,<br>0.004                       | 0.160 |

Note: Variables in Model 1= residential green- and blue space, unadjusted; Model 2= Model 1 + age, sex; Model 3= Model 2 + average neighborhood income; Model 4 = Model 3 + individual income; Model 5 = Model 4 + relationship status

$\beta$ = Standardized beta coefficient; B= Unstandardized beta coefficient

**Table S11.** Associations between residential green- and blue space at 50 m, 100 m, 300 m and 500 m buffers, and life satisfaction (subsample: working).

| 50 m Buffer | 100 m Buffer | 300 m Buffer | 500 m Buffer |
|-------------|--------------|--------------|--------------|
|-------------|--------------|--------------|--------------|

| Model,<br>N= | $\beta$ | B      | Lower,<br>upper<br>(95%<br>CI of<br>B) | p     | $\beta$ | B      | Lower,<br>upper<br>(95%<br>CI of<br>B) | p     | $\beta$ | B      | Lower,<br>upper<br>(95%<br>CI of<br>B) | p     | $\beta$ | B      | Lower,<br>upper<br>(95%<br>CI of<br>B) | p     |
|--------------|---------|--------|----------------------------------------|-------|---------|--------|----------------------------------------|-------|---------|--------|----------------------------------------|-------|---------|--------|----------------------------------------|-------|
| 10 177       |         |        |                                        |       |         |        |                                        |       |         |        |                                        |       |         |        |                                        |       |
| 1            | 0.027   | 0.002  | 0.000,<br>0.003                        | 0.007 | 0.023   | 0.002  | 0.000,<br>0.003                        | 0.018 | 0.029   | 0.002  | 0.001,<br>0.004                        | 0.004 | 0.021   | 0.002  | 0.000,<br>0.003                        | 0.032 |
| 2            | 0.025   | 0.002  | 0.000,<br>0.003                        | 0.012 | 0.022   | 0.001  | 0.000,<br>0.003                        | 0.027 | 0.027   | 0.002  | 0.001,<br>0.004                        | 0.006 | 0.020   | 0.002  | 0.000,<br>0.003                        | 0.042 |
| 3            | 0.027   | 0.002  | 0.001,<br>0.003                        | 0.006 | 0.022   | 0.002  | 0.000,<br>0.003                        | 0.024 | 0.023   | 0.002  | 0.000,<br>0.003                        | 0.018 | 0.014   | 0.001  | 0.000,<br>0.003                        | 0.148 |
| 4            | 0.028   | 0.002  | 0.001,<br>0.003                        | 0.005 | 0.022   | 0.001  | 0.000,<br>0.003                        | 0.024 | 0.024   | 0.002  | 0.000,<br>0.003                        | 0.014 | 0.016   | 0.001  | 0.000,<br>0.003                        | 0.110 |
| 5            | -0.009  | -0.001 | -0.002,<br>0.003                       | 0.352 | -0.016  | -0.001 | -0.002,<br>0.000                       | 0.113 | -0.008  | -0.001 | -0.002,<br>0.001                       | 0.418 | -0.012  | -0.001 | -0.002,<br>0.001                       | 0.207 |

Note: Variables in Model 1= residential green- and blue space, unadjusted; Model 2= Model 1 + age, sex; Model 3= Model 2 + average neighborhood income; Model 4 = Model 3 + individual income; Model 5 = Model 4 + relationship status

$\beta$ = Standardized beta coefficient; B= Unstandardized beta coefficient
